# Supplementary material
Source: PubMed Central journal article supplement (PMC4023150)
Supplement: npp201424x1.pdf [file npp201424x1.pdf]

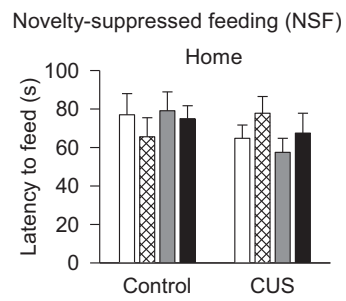

**Supplementary Figure S1** Neither CUS nor chronic JZL184 (JZL) treatment affected the latency to feed in the home cage in the NSF test ( $p > 0.05$ ;  $n = 11-12$  animals each group). Home, home cage.
